# Supplementary material for: Ultrasensitive supersandwich-type biosensor for enzyme-free amplified microRNA detection based on N-doped graphene/Au nanoparticles and hemin/G-quadruplexes
Source: Royal Society of Chemistry journal article supplement (doi:10.1039/c8tb00061a), 2018-01-01
Supplement: c8tb00061a1.pdf [file c8tb00061a1.pdf]

## Supporting Information

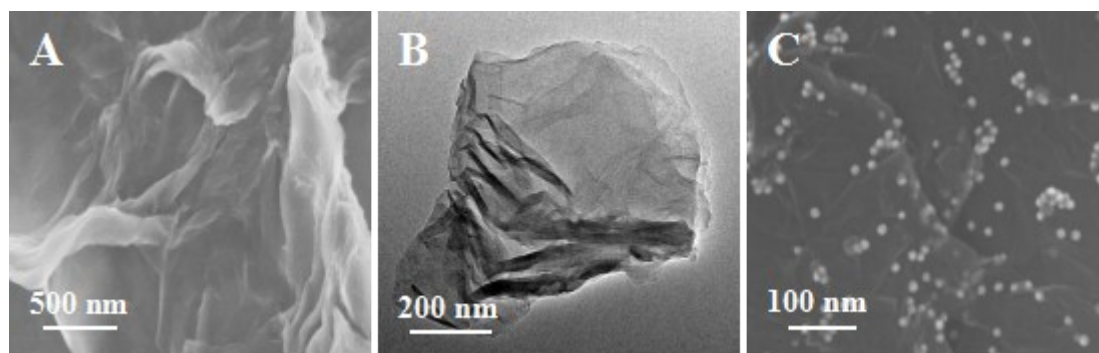

**Figure S1.** (A) SEM, (B) TEM images of the original GO. (C) SEM image of NG-AuNPs.

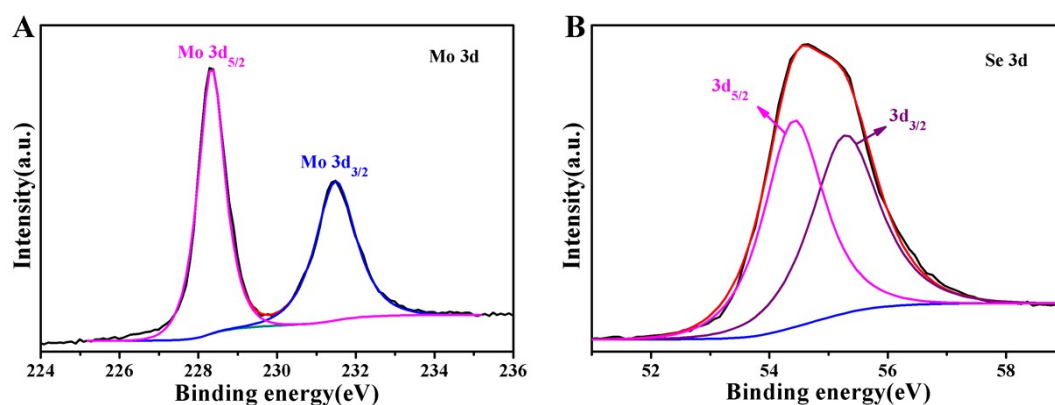

**Figure S2.** (A) Mo 3d and (B) Se 3d spectra of MoSe<sub>2</sub>.

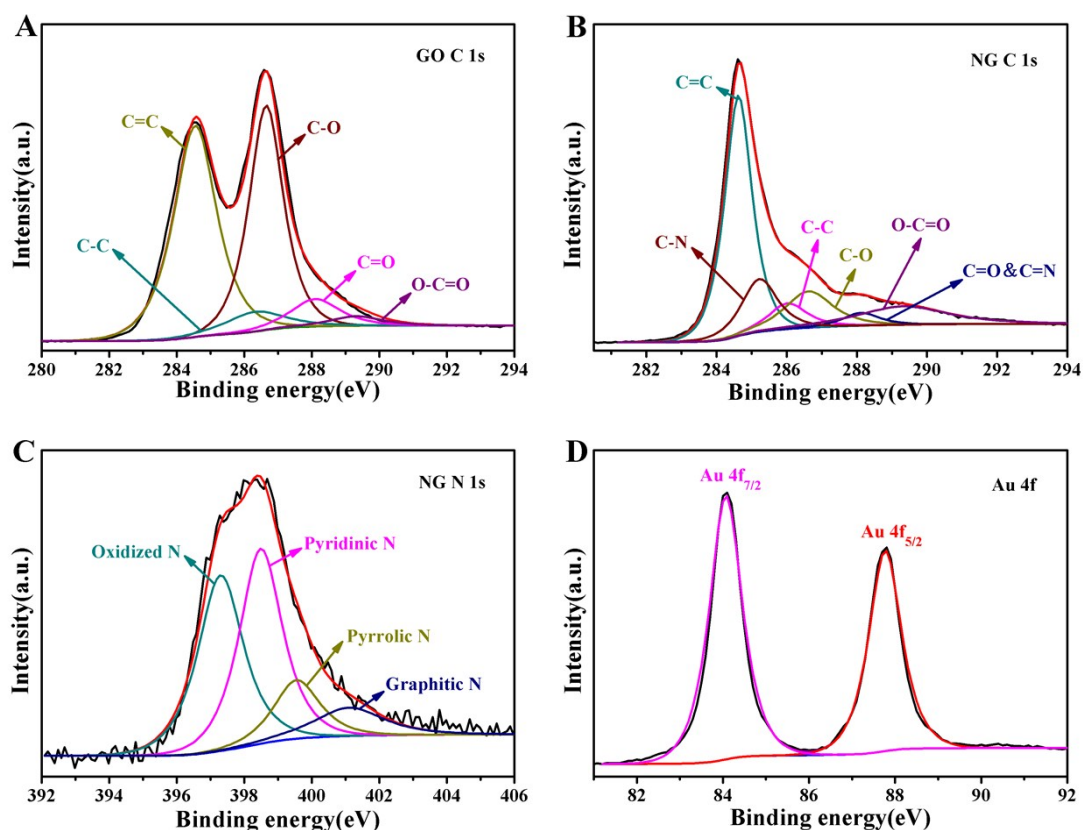

**Figure S3.** (A) C 1s spectra of GO, (B) C 1s and (C) N 1s spectra of NG, (D) Au 4f spectra of NG-AuNPs.

In order to calculate the effective surface areas, the chronocoulometry (CC) was performed in 0.1 mM  $[\text{Fe}(\text{CN})_6]^{3-}$  and 1.0 M KCl solution.<sup>1</sup> According to the equation as follows:

$$Q = 2nFAcD^{1/2}t^{1/2}/\pi^{1/2} + Q_{dl} + Q_{ads} \quad (1)$$

where  $Q$  (C),  $n$ ,  $F$  ( $\text{C mol}^{-1}$ ),  $A$  ( $\text{cm}^2$ ),  $c$  ( $\text{mol cm}^{-3}$ ),  $D$  ( $\text{cm}^2 \text{s}^{-1}$ ),  $t$  (s),  $Q_{dl}$  (C) and  $Q_{ads}$  (C) are charge, charge transfer number, Faraday constant, effective surface areas, substrate concentration, diffusion coefficient, electrolysis times, double layer charge and adsorption charge, respectively. According to Fig. S4A and B shown that the A calculation values of bare GCE and AuNPs/MoSe<sub>2</sub>/GCE were 0.015  $\text{cm}^2$  and 0.047  $\text{cm}^2$ , respectively. It was shown that MoSe<sub>2</sub> could apparently increase the effective surface area of electrode and the active sites. Nevertheless, as displayed in Fig. S4C, after MoSe<sub>2</sub> was immobilized onto electrode surface,

the DPV response dramatically increased by 227.4% owing to the signal amplification effect of the material. It was helpful to improve the sensitivity of the sensor.

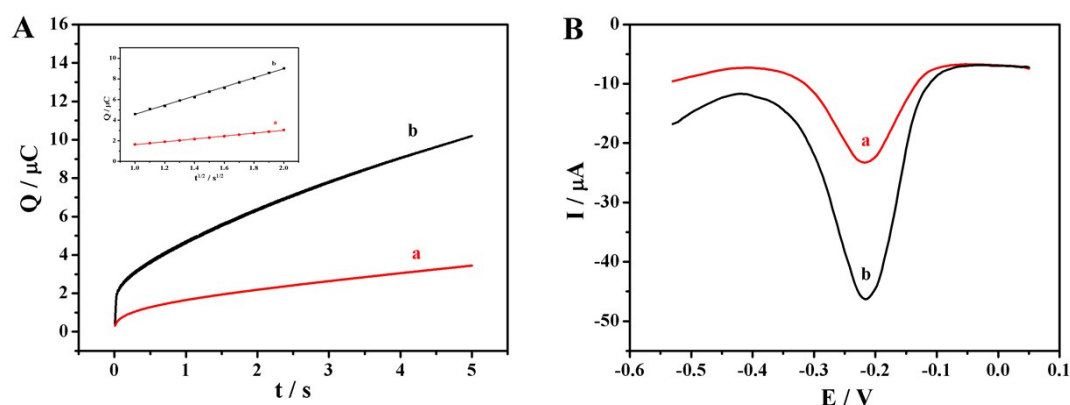

**Figure S4.** (A) Q-t curve of bare GCE (a) and AuNPs/MoSe<sub>2</sub>/GCE (b) in 0.1 mM [Fe(CN)<sub>6</sub>]<sup>3-</sup> and 1.0 M KCl solution. The inset was the Q-t<sup>1/2</sup> curve. (B) The DPV responses of hemin/assistance DNA/DNA-linked NG-AuNPs hybrids/miRNA/MCH/ capture probe/AuNPs/GCE (a) and hemin/ assistance DNA/DNA-linked NG-AuNPs hybrids /miRNA/MCH/capture probe/AuNPs/MoSe<sub>2</sub>/GCE (b), which were measured in a certain volume of 10 mM PBS buffer (pH 8.0) containing 50 mM NaCl, 10 mM MgCl<sub>2</sub>.

**Table S1.** Different methods for miRNA-21 detection.

DPV: differential pulse voltammetry; ECL: electrochemiluminescence.

| Amplification strategy                                     | Methods      | LOD     | References |
|------------------------------------------------------------|--------------|---------|------------|
| Target-guide assembly of AuNPs                             | ECL          | 20 fM   | 2          |
| Polymerase chain reaction amplification                    | DPV          | 1.0 pM  | 3          |
| Gold nanoparticle loaded split-DNAzyme-probe amplification | Fluorescence | 10 pM   | 4          |
| Mismatched catalytic hairpin assembly                      | DPV          | 0.6 pM  | 5          |
| AuNPs-decorated MoS <sub>2</sub> nanosheet amplification   | DPV          | 0.78 fM | 6          |

|                                                  |              |         |           |
|--------------------------------------------------|--------------|---------|-----------|
| Duplex-specific nuclease signal amplification    | Fluorescence | 1 pM    | 7         |
| Hairpin assembly target recycling amplification  | DPV          | 0.35 fM | 8         |
| Hybrid antibody and enzymatic amplification      | DPV          | 0.4 fM  | 9         |
| NG-AuNPs hybrids and supersandwich amplification | DPV          | 0.17 fM | This work |

**Table S2.** Detection of miRNA-21 in serum samples ( $n=3$ ).

| Samples | qRT-PCR <sup>a</sup> (fM) | Proposed biosensor (fM) |
|---------|---------------------------|-------------------------|
| 1       | $32.7 \pm 2.8$            | $33.1 \pm 3.8$          |
| 2       | $35.6 \pm 3.4$            | $34.8 \pm 4.1$          |
| 3       | $36.7 \pm 2.5$            | $37.8 \pm 2.4$          |
| 4       | $38.9 \pm 2.9$            | $38.1 \pm 4.2$          |

## References

- 1 H. L. Shuai, K. J. Huang, W. J. Zhang, X. Cao and M. P. Jia, *Sens. Actuators. B.* 2017, **243**, 403.
- 2 H. Xiong and X. Zheng, *Microchim. Acta.* 2017, **184**, 1781.
- 3 M. N. Islam, V. Gopalan, M. H. Haque, M. K. Masud, M. S. Al Hossain, Y. Yamauchi and M. J. Shiddiky, *Biosens. Bioelectron.* 2017, **98**, 227.
- 4 Y. Wu, J. Huang, X. Yang, Y. Yang, K. Quan, N. Xie and K. Wang, *Anal. Chem.* 2017, **89**, 8377.
- 5 Y. Zhang, Y. Yan, W. Chen, W. Cheng, S. Li, X. Ding and S. Ding, *Biosens. Bioelectron.* 2015, **68**, 343.
- 6 S. Su, W. Cao, W. Liu, Z. Lu, D. Zhu, J. Chao and L. Wang, *Biosens. Bioelectron.* 2017, **94**, 552.
- 7 H. Zhou, J. Peng, X. Qiu, Y. Gao, L. Lu and W. Wang, *J. Mater. Chem. B.* 2017, **5**, 7426.
- 8 H. Wang, Y. Jian, Q. Kong, H. Liu, F. Lan, L. Liang and J. Yu, *Sens. Actuators. B.* 2018, **257**, 561.

9 M. Wang, B. Li, Q. Zhou, H. Yin, Y. Zhou and S. Ai, *Electrochim. Acta*. 2015, **165**, 130.
